# Supplementary material for: The Non-Flagellar Type III Secretion System Evolved from the Bacterial Flagellum and Diversified into Host-Cell Adapted Systems
Source: PLOS journal article supplement (doi:10.1371/journal.pgen.1002983), 2012-09-27

Flagellum profile scores

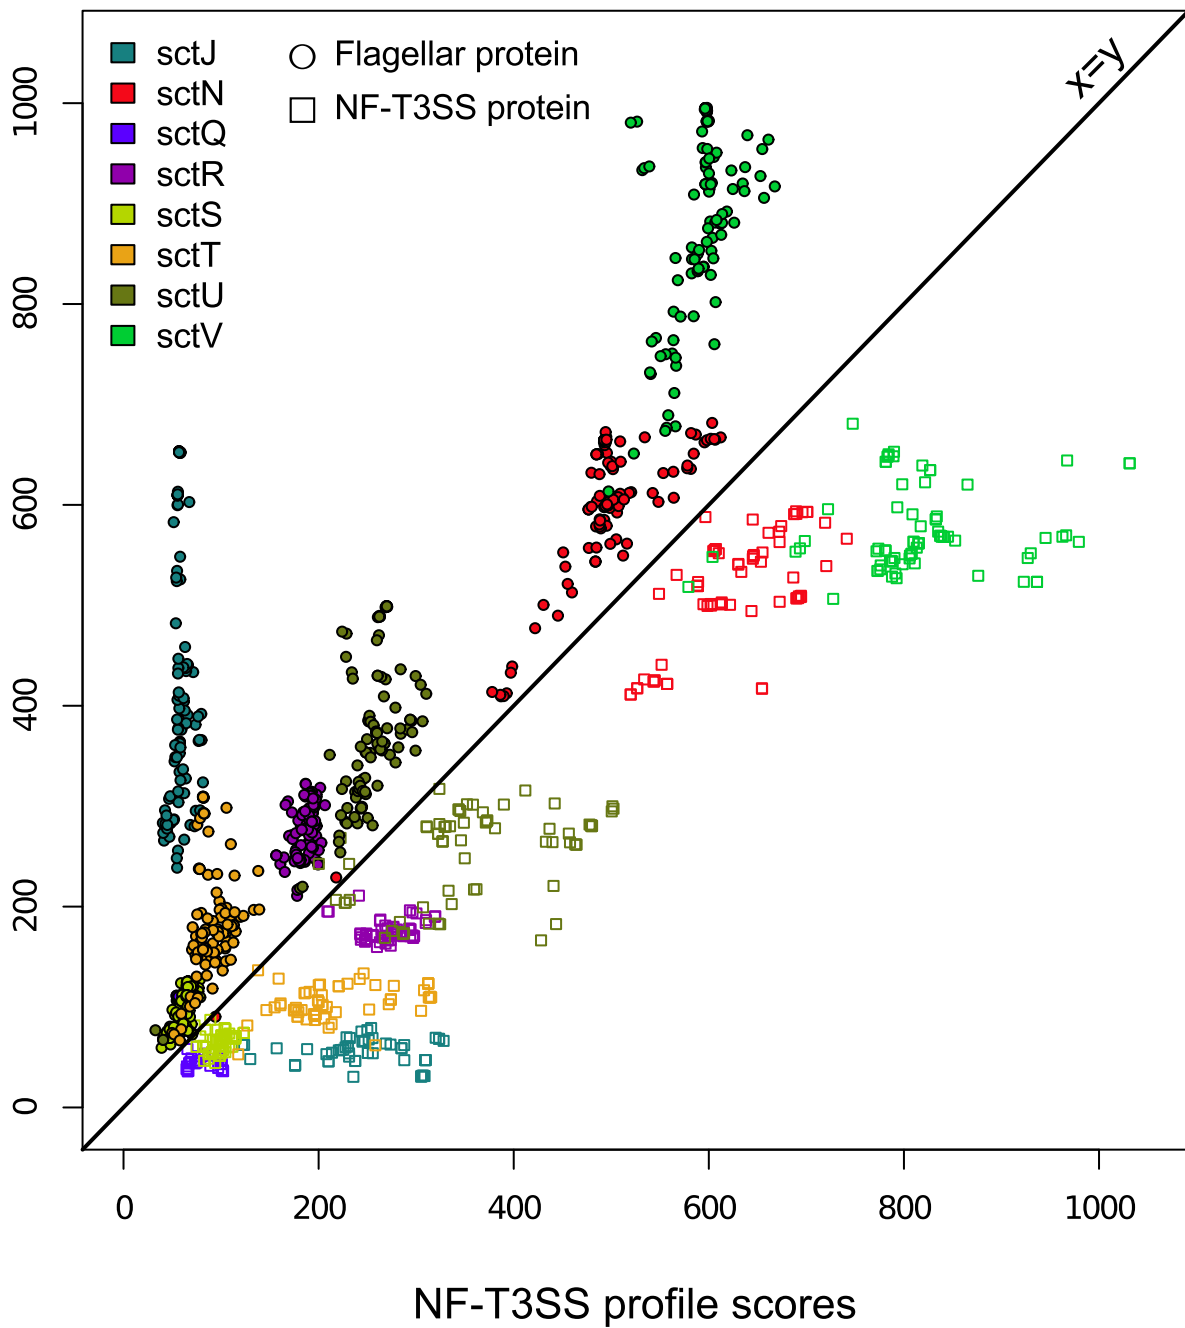

Supplement: S3 (10.1371/journal.pgen.1002983.s003) [file journal.pgen.1002983.s003]
